# Supplementary material
Source: PubMed Central journal article supplement (PMC5253250)

| <b>Supplemental Table 1.</b> Interaction between FC and Group on Cognitive Function              |                 |         |                 |         |                 |         |
|--------------------------------------------------------------------------------------------------|-----------------|---------|-----------------|---------|-----------------|---------|
|                                                                                                  | Memory          |         | EF              |         | MOCA            |         |
|                                                                                                  | Wald's $\chi^2$ | p value | Wald's $\chi^2$ | p value | Wald's $\chi^2$ | p value |
| ACC-Rparahippocampus                                                                             | 6.08            | .033    | 6.74            | .034    | 2.73            | .26     |
| MCC-LSTG                                                                                         | 1.06            | .59     | 1.35            | .51     | 0.77            | .68     |
| MCC-RMFG                                                                                         | 7.18            | .028    | 1.50            | .47     | 4.24            | .12     |
| MCC-Rthalamus                                                                                    | 1.26            | .53     | 1.54            | .46     | 2.57            | .28     |
| PCC-Lprecuneus                                                                                   | 6.80            | .033    | 1.22            | .54     | 4.99            | .08     |
| Controlled for age, education, group, and FC.<br>None remained significant after FDR correction. |                 |         |                 |         |                 |         |

| <b>Supplemental Table 2. Group<sup>#</sup> Comparison in the Background Characteristics</b>                                                                                                                                |                           |                            |                             |                                 |
|----------------------------------------------------------------------------------------------------------------------------------------------------------------------------------------------------------------------------|---------------------------|----------------------------|-----------------------------|---------------------------------|
|                                                                                                                                                                                                                            | Supernormal<br>(n = 9)    | HC<br>(n = 9)              | MCI <sup>#</sup><br>(n = 7) | F or $\chi^2$ test (p<br>value) |
| EM, M (SD)                                                                                                                                                                                                                 | 1.83 (0.23)               | 1.03 (0.13)                | -0.10 (0.35)                | 123.12 (< .001)                 |
| EF, M (SD)                                                                                                                                                                                                                 | 1.16 (0.85)               | 0.73 (0.65)                | 0.45 (0.79)                 | 1.89 (.18)                      |
| MOCA, M (SD)                                                                                                                                                                                                               | 28.22 (1.48) <sup>a</sup> | 25.56 (2.13) <sup>b</sup>  | 21.44 (2.74) <sup>c</sup>   | 33.54 (< .001)                  |
| SUVR, M (SD)                                                                                                                                                                                                               | 1.04 (0.09) <sup>a</sup>  | 1.16 (0.17) <sup>a,b</sup> | 1.25 (0.09) <sup>b</sup>    | 5.56 (.011)                     |
| • SUVR+, n (%)                                                                                                                                                                                                             | 2 (22.2) <sup>a</sup>     | 4 (44.4) <sup>a</sup>      | 7 (100) <sup>b</sup>        | 9.87 (.007)                     |
| ACC-Rparahippocampus                                                                                                                                                                                                       | 0.14 (0.09) <sup>a</sup>  | -0.18 (0.10) <sup>b</sup>  | -0.14 (0.13) <sup>b</sup>   | 22.14 (< .001)                  |
| MCC-LSTG                                                                                                                                                                                                                   | 0.26 (0.12) <sup>a</sup>  | 0.003 (0.01) <sup>b</sup>  | 0.07 (0.12) <sup>b</sup>    | 17.77 (< .001)                  |
| MCC-RMFG                                                                                                                                                                                                                   | -0.14 (0.15) <sup>a</sup> | 0.02 (0.03) <sup>b</sup>   | 0.17 (0.09) <sup>c</sup>    | 17.68 (< .001)                  |
| MCC-Rthalamus                                                                                                                                                                                                              | -0.15 (0.05) <sup>a</sup> | 0.01 (0.07) <sup>b</sup>   | 0.17 (0.18) <sup>c</sup>    | 17.21 (< .001)                  |
| PCC-Lprecuneus                                                                                                                                                                                                             | 0.42 (0.10) <sup>a</sup>  | 0.16 (0.08) <sup>b</sup>   | 0.15 (0.16) <sup>b</sup>    | 21.01 (< .001)                  |
| # excluding two MCI cases being amyloid negative.                                                                                                                                                                          |                           |                            |                             |                                 |
| <sup>a, b, c</sup> means with different superscripts are significantly different from each other; means with the same superscript are not significantly different (Least Significant Difference's post hoc test, p < .05). |                           |                            |                             |                                 |

**Supplemental Table 3. Interaction between FC and Group# on Cognitive Function**

|                      | Memory          |         | EF              |         | MOCA            |         |
|----------------------|-----------------|---------|-----------------|---------|-----------------|---------|
|                      | Wald's $\chi^2$ | p value | Wald's $\chi^2$ | p value | Wald's $\chi^2$ | p value |
| ACC-Rparahippocampus | 7.38            | .025    | 4.08            | .13     | 2.05            | .36     |
| MCC-LSTG             | 0.51            | .78     | 1.74            | .42     | 0.35            | .84     |
| MCC-RMFG             | 9.97            | .007*   | 2.97            | .23     | 10.49           | .005*   |
| MCC-Rthalamus        | 0.37            | .83     | 1.28            | .53     | 4.30            | .12     |
| PCC-Lprecuneus       | 5.16            | .076    | 1.72            | .42     | 12.073          | .002*   |

# excluding two MCI cases being amyloid negative.  
Controlled for age, education, group, and FC.  
\* remained significant after FDR correction.

**Supplemental Figure. Participants' Longitudinal Cognitive Profile from Baseline to up to 4 years follow up. A. group trajectories with mean and standard error; B. individual trajectories.**

EM and EF here were standardized composite scores across all ADNI participants (see Crane et al., 2012; Gibbons et al., 2012 for more info). For display purpose only, MOCA here were standardized across participants in the present study; in the actual analysis, raw MOCA score was used. SN = supernormal; HC = healthy control; MCI = mild cognitive impairment; EM = episodic memory; EF = executive function; MOCA = Montreal Cognitive Assessment.

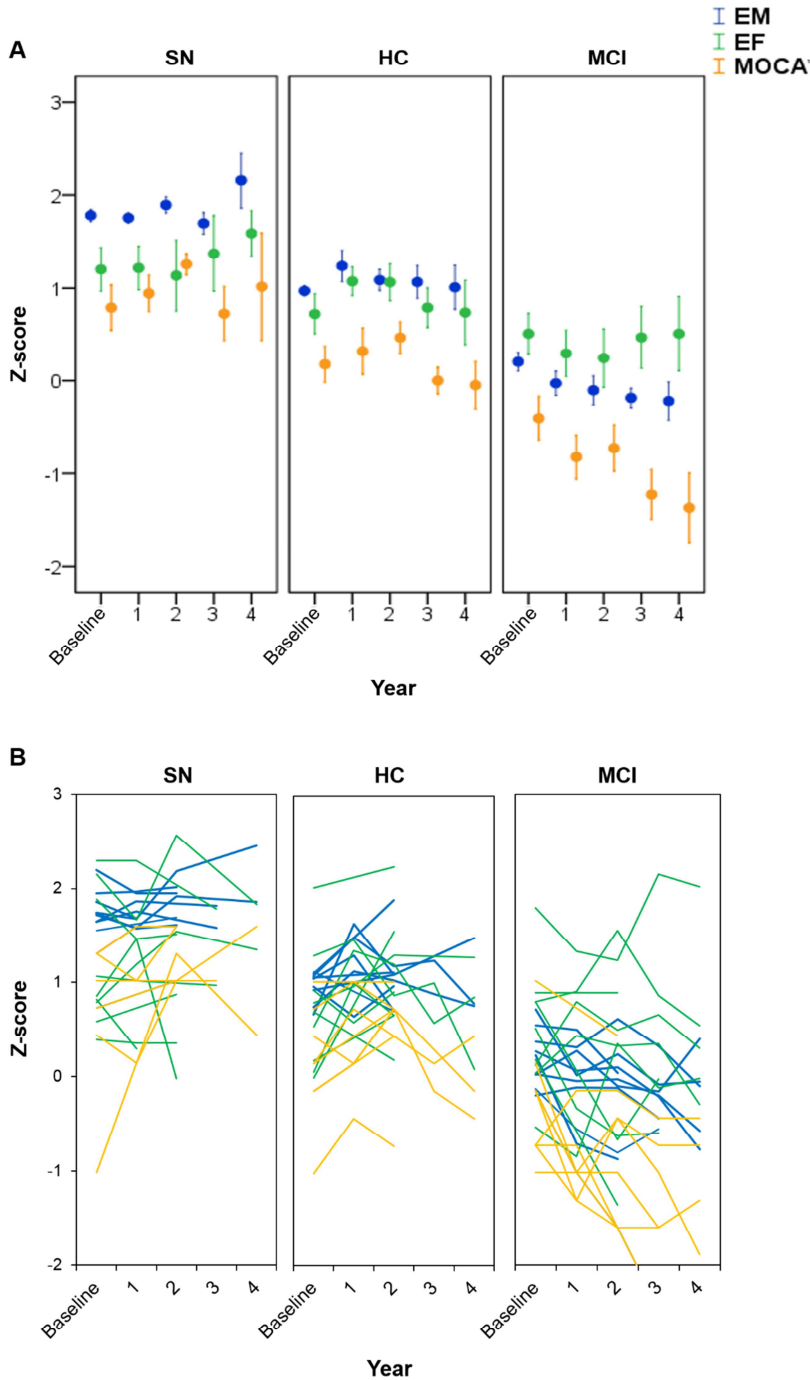

Supplement: NIHMS831133-supplement-supplement_1.pdf [file NIHMS831133-supplement-supplement_1.pdf]
